# Supplementary material
Source: Springer Nature journal article supplement (https://www.springermedizin.de/resource/supplementary/13024_2014_537_MOESM9_ESM.pdf/9644342)

Color Key

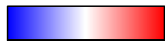

-0.2 0 0.2

Value

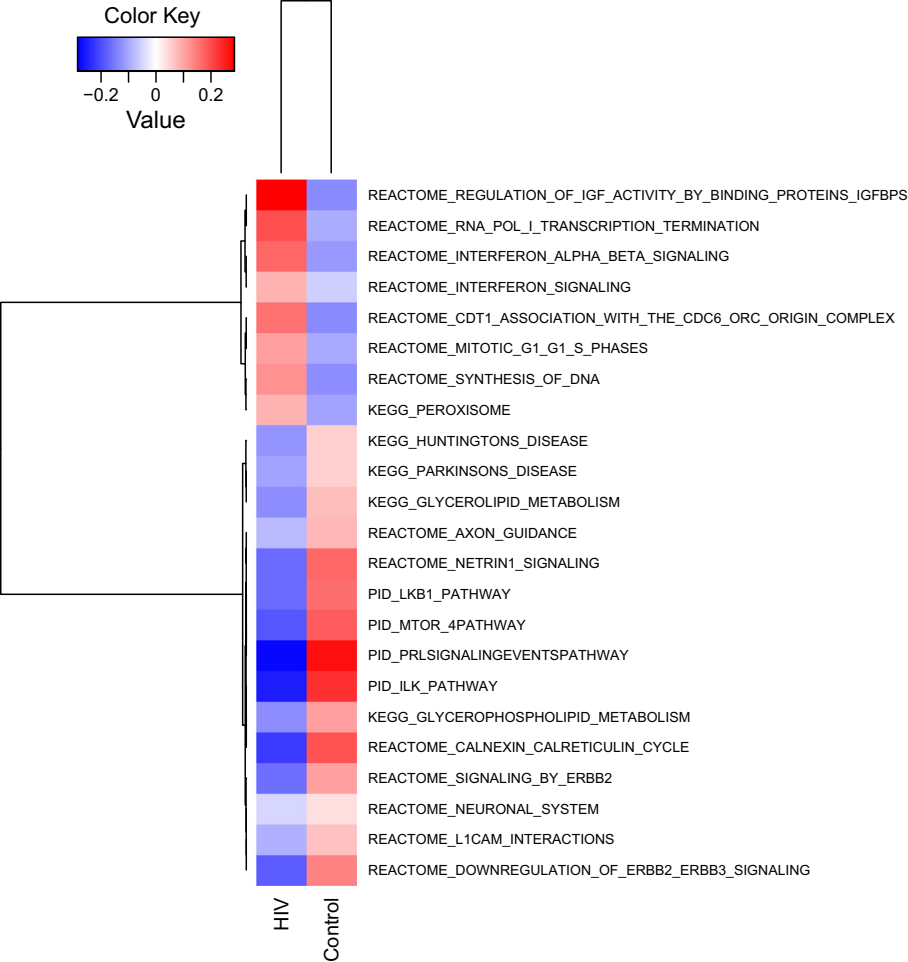

Supplement: MOESM9 [file 9644342]
